# Supplementary material for: Genome-Wide Identification and Expression Analysis of the Aquaporin Gene Family in Lycium barbarum during Fruit Ripening and Seedling Response to Heat Stress
Source: MDPI journal article supplement (doi:10.3390/cimb44120404), 2022-11-28
Supplement: s1 [file s1]

| Genes    | Primers (5'-3')         | TM value(°C) | Length (bp) |
|----------|-------------------------|--------------|-------------|
| LbNIP5;1 | F GGTGGCGTTACTGTTCCCTTC | 58.85        | 149         |
|          | R ACTGTGGCTCCAAGTCTAT   | 59.01        |             |
| LbNIP6;1 | F AGTGGGCTGGCTGTAATGAT  | 59.08        | 109         |
|          | R TCCAGGGGAAATGCTTGAGA  | 58.63        |             |
| LbNIP4;3 | F TGGGGAGCAGTTGTAATGGT  | 58.93        | 171         |
|          | R TAAAGTACCGCCTGCCAGAA  | 59.02        |             |
| LbNIP4;2 | F CAGTGTGCCATCTTCAGCTC  | 58.91        | 101         |
|          | R TCACGACCTGCCTTTTCTCT  | 58.95        |             |
| LbNIP4;4 | F GGGGTCGATTCTAGCAAGCT  | 59.53        | 151         |
|          | R AACTCCGCAAACAACGAACA  | 58.91        |             |
| LbNIP4;1 | F TCCATACAGCCTCCGATTCC  | 58.95        | 129         |
|          | R TCCCTATGACCTCCGCAATC  | 58.95        |             |
| LbNIP3;1 | F CAACGTCGTAACACTACCCG  | 58.67        | 420         |
|          | R CCTGTTAGTGGCCCAGAGAA  | 59.02        |             |
| LbNIP1;2 | F AACTTGCTGGTCTTGCTGTG  | 58.97        | 115         |
|          | R CTTGACACTATTGCTGGGCC  | 58.90        |             |
| LbNIP2;1 | F AAACACGATCACTTTGCCGG  | 59.41        | 122         |
|          | R ATTGGCCCGCTAAACATCAC  | 58.90        |             |
| LbTIP5;1 | F CATGTGAATCCGGCTGTGAC  | 59.27        | 107         |
|          | R CAAGCCATGACAGACCCAAG  | 58.83        |             |
| LbTIP2;3 | F TTGGAACCATTGCACCCATG  | 59.02        | 109         |
|          | R GCTGGCCCAAATGATCTAGC  | 59.04        |             |
| LbTIP2;1 | F GGTTTCCATTGCCGCTAACA  | 59.11        | 109         |
|          | R AATCCAGTAGAAGAGGCCGG  | 58.88        |             |
| LbTIP2;4 | F GGCTCCATTGTTGCTTGCTA  | 58.82        | 102         |
|          | R CACAACCTTCAGCAGCTC    | 58.84        |             |
| LbTIP2;2 | F CTGCTGTCACCTTCGGATTG  | 58.92        | 111         |
|          | R ATTTGAGGAGGAGGCAAGCT  | 59.00        |             |
| LbTIP4;1 | F GGAGCTTCAATGAACCCTGC  | 59.19        | 109         |
|          | R CAGCAAGACCACCACCAATC  | 59.12        |             |
| LbTIP1;1 | F GTTTTCGCAGGTCAGGGTTC  | 59.41        | 142         |
|          | R CGGAGATGTTAGCACCAACG  | 59.00        |             |
| LbTIP3;1 | F TGGGCTGGTCTACACTGTTT  | 58.86        | 147         |
|          | R CTTGCTGGATTCATGGACGC  | 59.62        |             |
| LbTIP3;2 | F CATTGCCCCCTTTGCCATTG  | 59.82        | 148         |
|          | R GCCCAACCAGTAGATCCAGT  | 59.09        |             |
| LbXIP1;6 | F AGCAGGCCTCCTTGTTTA    | 59.23        | 146         |

|           |                        |       |     |
|-----------|------------------------|-------|-----|
|           | R GCCCAACCCAAAAGATCCAA | 58.65 |     |
| LbXIP1;2  | F ACTACTAGGCTCAGCGGTTC | 58.90 | 133 |
|           | R CGCGAGGAGTAGGATTGTGA | 59.26 |     |
| LbPIP2;12 | F CTTGATCTCCCCTGGCTACA | 58.50 | 219 |
|           | R ACCAAGAACGCTGCAAATCC | 59.40 |     |
| LbPIP1;6  | F TGGTGCTGGTGTGTCAAAG  | 58.90 | 133 |
|           | R GACAAGAACAAAGGTGCCGA | 58.69 |     |
| LbPIP1;2  | F AACCAGGGCAGTGTCTACA  | 58.86 | 120 |
|           | R CTCACAACATTGGCACCTCC | 59.12 |     |
| LbPIP1;5  | F TCGGAGAGGGCACATTAACC | 59.46 | 133 |
|           | R ACCTTTGACAACACCAGCAC | 58.90 |     |
| LbPIP1;3  | F TTGGGTACTGCTGCACAAAC | 58.97 | 110 |
|           | R TCAGCAATTCCAGCCCTGTA | 59.01 |     |
| LbPIP1;1  | F CTTGGTGCTATCTGTGGTGC | 58.91 | 120 |
|           | R AGCACCAAGTCCATCACCTT | 59.23 |     |
| LbPIP1;4  | F ACTGATGCCAAGAGAAACGC | 58.84 | 106 |
|           | R CGGTAATTGGGATGGTTGCC | 59.26 |     |
| LbPIP2;11 | F CAGTGGCGTACATGATGGTG | 58.99 | 139 |
|           | R AATGCTACGCCCCTTGAGTA | 58.80 |     |
| LbPIP2;9  | F CCAGCAGTGACATTTGGGTT | 58.67 | 150 |
|           | R ACCACCACCACCTATGTTGT | 58.85 |     |
| LbPIP2;8  | F CTTCTTGGTATCGCTTGGGC | 58.98 | 100 |
|           | R CGAATGTCACTGCTGGGTTA | 57.91 |     |
| LbPIP2;6  | F TACTGATCCACCTCCTGC   | 58.80 | 191 |
|           | R AGTATACCAACACCACCGCA | 59.02 |     |
| LbPIP2;4  | F TCTGGAGGACACATCAACCC | 59.02 | 134 |
|           | R AAAGCCTTGACGAAACCCAC | 58.97 |     |
| LbPIP2;10 | F GAGCTGCCGTTATCCTCAAC | 58.71 | 147 |
|           | R TCCTGAATGAACCAAGGGCT | 58.92 |     |
| LbPIP2;7  | F TCTTGGCTCCACTTCCCATT | 58.92 | 232 |
|           | R CCAAGAGGTTTGATGGCACC | 59.11 |     |
| LbPIP2;5  | F TGCTGAGTTCATTGCCACAC | 59.05 | 447 |
|           | R GGGTCAGTGGCAGAAAAGAC | 58.76 |     |
| LbPIP2;1  | F ATGACTAAGGACGTTGAGGT | 50.90 | 110 |
|           | R CTGTAAAATGACCATTTTCC | 49.90 |     |
| LbPIP2;2  | F ATGGGTAAAGACATCGAAGT | 51.10 | 110 |
|           | R CTGTAAAATGACCATTTTCC | 49.90 |     |
| LbACTIN1  | F CTCAGCACCTTCCAGCAGAT | 57.50 |     |
